# Supplementary material for: Current availability and distribution of Congo Basin’s freshwater resources
Source: Springer Nature journal article supplement (doi:10.1038/s43247-023-00836-z), 2023-05-22
Supplement: 43247_2023_836_MOESM1_ESM.pdf [file 43247_2023_836_MOESM1_ESM.pdf]

# Supplementary Materials for Current availability and distribution of Congo basin's freshwater resources

Mohammad J. Tourian, Fabrice Papa, Omid Elmi, Nico Sneeuw,  
Benjamin Kitambo, Raphael Tshimanga, Adrien Paris, and Stéphane Calmant

Correspondence to: [tourian@gis.uni-stuttgart.de](mailto:tourian@gis.uni-stuttgart.de)

April 17, 2023

## Supplementary Notes 1, Sub-basins in Congo River Basin

We study the Congo Basin and its sub-basins: Kasai, Middle-Congo, Ubangui, Sangha, Lualaba-North, Lualaba-South and Lualaba-Lukuga covering an area of 3 610 012 km<sup>2</sup>. Table S1 lists these sub-basins with their mean annual precipitation, discharge, evapotranspiration and dominant climate of each subbasin.

Table S1: Subbasins of Congo Basin with their mean annual precipitation, discharge, evapotranspiration, and dominant climate of each subbasin. Precipitation estimates are from GPCP data and evapotranspiration from ERA5 for the period 2002-2018. Discharge values were obtained from discharge data within the period specified in Table S2.

| Basin          | Area<br>[km <sup>2</sup> ] | precipitation<br>[mm/yr] | discharge<br>[mm/yr] | evapotranspiration<br>[mm/yr] | Climate classification                         |
|----------------|----------------------------|--------------------------|----------------------|-------------------------------|------------------------------------------------|
| Kasai          | 895 633                    | 1406±56                  | 282±11               | 1077±27                       | Tropical savanna climate                       |
| Middle Congo   | 879 050                    | 1509±48                  | 498±20               | 1168±28                       | Tropical rainforest climate                    |
| Ubangui        | 649 495                    | 1352±54                  | 142±09               | 1051±29                       | Tropical savanna climate                       |
| Sangha         | 213 654                    | 1291±78                  | 204±13               | 1001±25                       | Tropical rainforest and monsoon climate        |
| Lualaba-North  | 250 975                    | 1400±67                  | 535±38               | 1133±27                       | Tropical savanna and monsoon climate           |
| Lualaba-South  | 454 093                    | 1053±68                  | 148±16               | 900±28                        | Tropical savanna and humid subtropical climate |
| Lualaba-Lukuga | 267 108                    | 896±79                   | 9±01                 | 866±25                        | Tropical savanna climate                       |
| Congo          | 3 615 546                  | 1454±37                  | 335±09               | 1157±27                       | all above                                      |

## Supplementary Notes 2, Lake water storage anomaly

Figure S1 shows the time series of lake volume anomaly of Mai-Ndombe, Bangweulu, Upemba, Mweru, Kivu, and Tanganyika. The time series of Lake Tanganyika and Lake Mai-Ndombe are obtained by combining the time series of lake surface water extent and lake water levels provided by the HydroSat database and accessible at <http://hydrosat.gis.uni-stuttgart.de/>. Time series of water volume anomaly of Lake Mweru, Lake Kivu, and Lake Bangweulu are provided by the Hydroweb database [1] and accessible at <http://hydroweb.theia-land.fr/>.

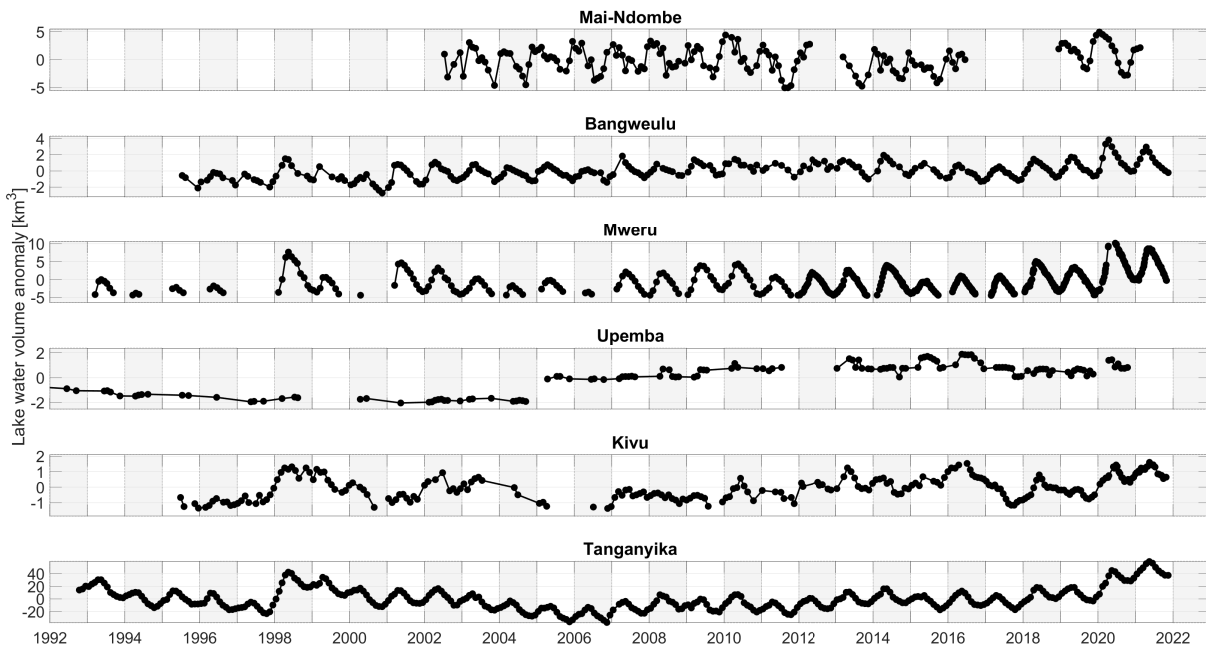

Figure S1: Time series of lake volume anomaly of Mai-Ndombe, Bangweulu, Upemba, Mweru, Kivu, and Tanganyika. The time series of Lake Tanganyika and Lake Mai-Ndombe are obtained by combining the time series of lake surface water extent and lake water levels provided by the HydroSat database and accessible at <http://hydrosat.gis.uni-stuttgart.de/>. Time series of water volume anomaly of Lake Mweru, Lake Kivu, and Lake Bangweulu are provided by the Hydroweb database [1] and accessible at <http://hydroweb.theia-land.fr/>.

### Supplementary Notes 3, Surface Water Storage Anomaly

Figure S2 shows the time series of Surface Water Storage Anomaly (SWSA) of five wetlands of Mai-Ndombe, Bangwelu, Mweru, Mweru Wantipa and Upemba derived from the combination of Surface Water Extent (SWE) estimates from the Global Inundation Extent from Multi-Satellite (GIEMS-2) with topographic data from the Forest And Buildings removed Copernicus 30m Digital Elevation Model (FABDEM) following a hypsometric approach.

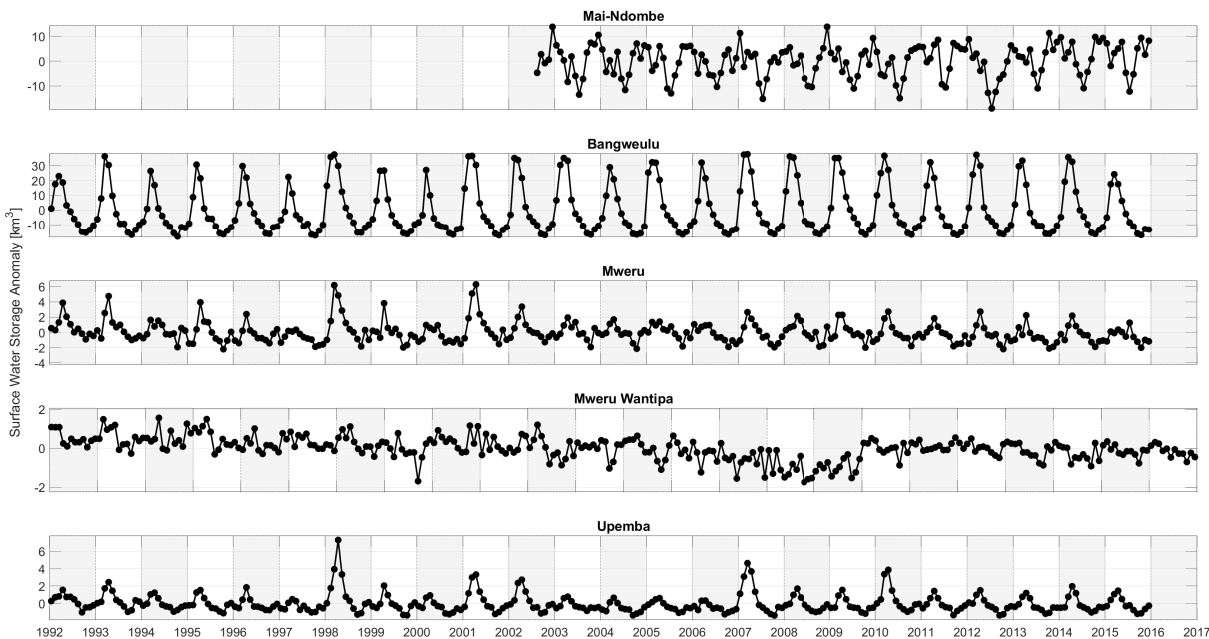

Figure S2: Time series for the period 1992–2015 of Surface Water Storage Anomaly (SWSA) of five wetlands of Mai-Ndombe, Bangwelu, Mweru, Mweru Wantipa and Upemba derived from the combination of Surface Water Extent (SWE) estimates from the Global Inundation Extent from Multi-Satellite (GIEMS-2) with topographic data from the Forest And Buildings removed Copernicus 30m Digital Elevation Model (FABDEM) following a hypsometric approach

### Supplementary Notes 4, River discharge from altimetry

For discharge data, we use gauge stations represented by black dots in Figure 1 of the manuscript. Since only legacy discharge data (up to 1959) are available at the outlet of the Kasäi, the Lualaba-North, the Lualaba-South and the Lualaba-Lukuga subbasins, we estimate discharge using water level from satellite altimetry through the quantile function approach proposed by [2]. Figure 1 of the manuscript shows the selected virtual stations in yellow dots. Rating curves are obtained by matching the quantile functions of in situ discharge and altimetry water level measurements. Figure S3 shows the obtained rating curve and Figure S4 represents estimated altimetric discharge for these 4 basins. Table S2 lists the used discharge data of the outlet of each basin. For the Kasäi, the Lualaba-North, the Lualaba-South and the Lualaba-Lukuga discharge data are available only up to 1959 (shaded gray).

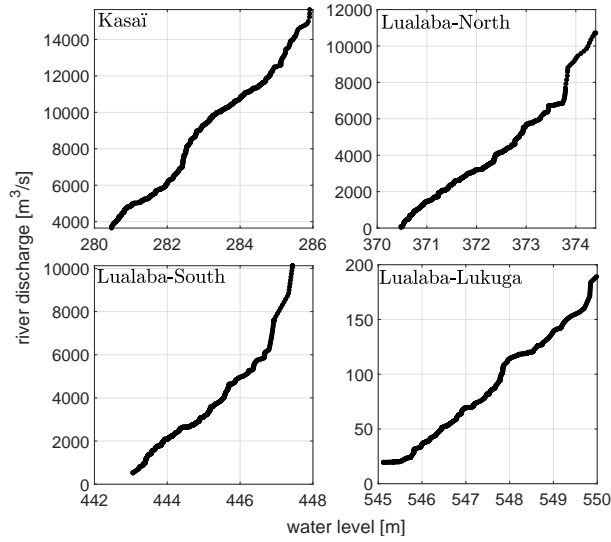

Figure S3: Rating curves obtained by the quantile function matching of legacy discharge and satellite altimetric water level time series for the Kasai, the Lualaba-North, the Lualaba-South and the Lualaba-Lukuga. The time period of discharge and altimetric water level time series are indicated in Table S2.

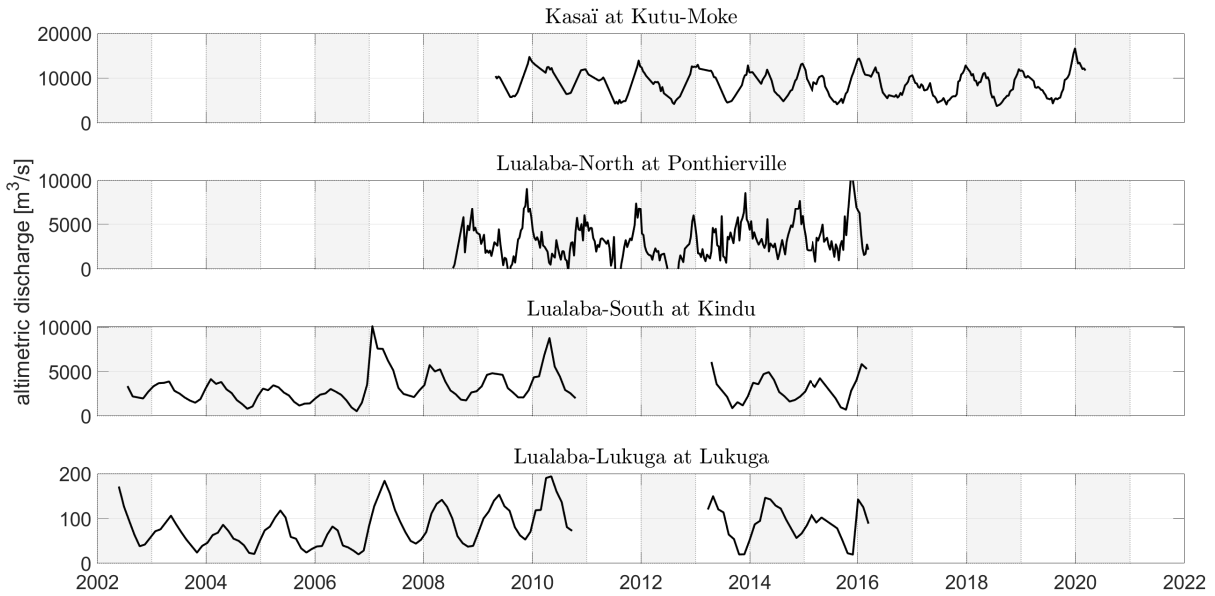

Figure S4: Altimetric discharge obtained by the quantile function matching of legacy discharge and satellite altimetric water level time series for the Kasai, the Lualaba-North, the Lualaba-South and the Lualaba-Lukuga



Table S2: Discharge data source for the Congo Basin and its sub-basins. Water level from satellite altimetry is used to update discharge for the basins highlighted in gray using the quantile function approach [2]. J2, J3, Env and SRL in the table refer to Jason-2, Jason-3, Envisat, and Saral/AltiKa missions, respectively.

| Basin          | station       | in situ discharge |         |             | water level from altimetry |         |         |             |
|----------------|---------------|-------------------|---------|-------------|----------------------------|---------|---------|-------------|
|                |               | Lat [°]           | Lon [°] | time period | Mission                    | Lat [°] | Lon [°] | time period |
| Kasaï          | Kutu-Moke     | -3.18             | 17.38   | 1932–1991   | J2&J3                      | -3.06   | 16.62   | 2009–2020   |
| Middle Congo*  | Brazzaville   | -4.27             | 15.32   | 1990–2020   |                            |         |         |             |
| Ubangui        | Ubangui       | 4.37              | 18.61   | 1990–2020   |                            |         |         |             |
| Sangha         | Queso         | 1.62              | 16.05   | 1990–2020   |                            |         |         |             |
| Lualaba-North* | Ponthierville | -0.35             | 25.45   | 1932–1959   | J2&J3                      | 0.72    | 24.56   | 2009–2016   |
| Lualaba-South  | Kindu         | -2.95             | 25.92   | 1933–1989   | Env&SRL                    | -2.96   | 25.93   | 2002–2016   |
| Lualaba-Lukuga | Lukuga        | -5.91             | 29.19   | 1950–1959   | Env&SRL                    | -5.74   | 26.91   | 2002–2016   |
| Congo          | Brazzaville   | -4.27             | 15.32   | 1990–2020   |                            |         |         |             |

\*: incremental basin



## Supplementary Notes 5, Water storage-discharge relationship

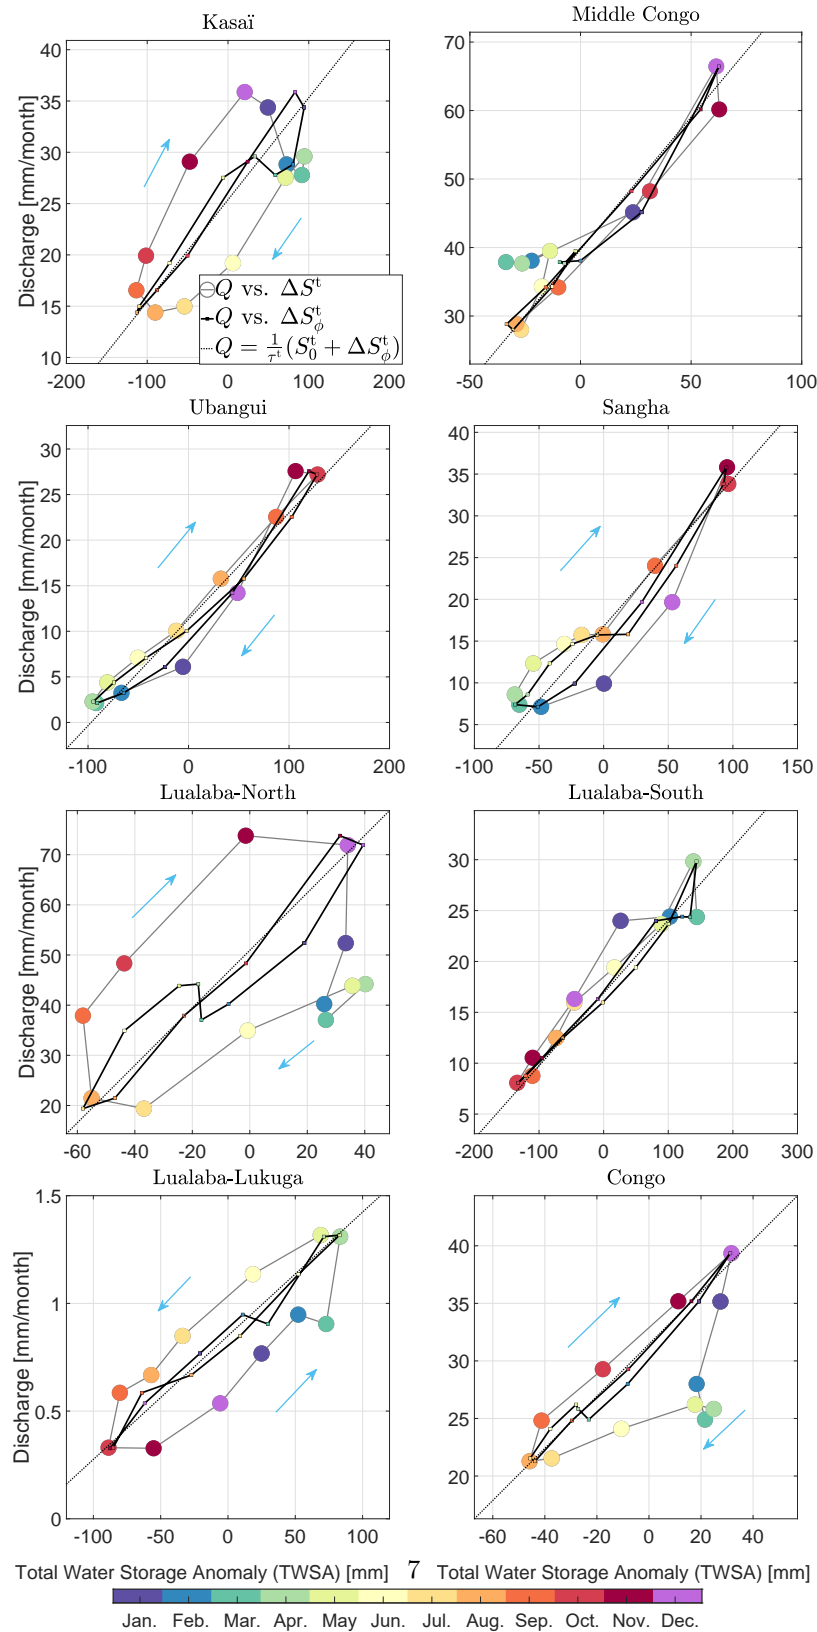

Figure S5: Mean monthly river discharge  $Q$  against mean monthly Total Water Storage Anomaly (TWSA)  $\Delta S^t$  and time-shifted total water storage anomaly  $\Delta S_\phi^t$

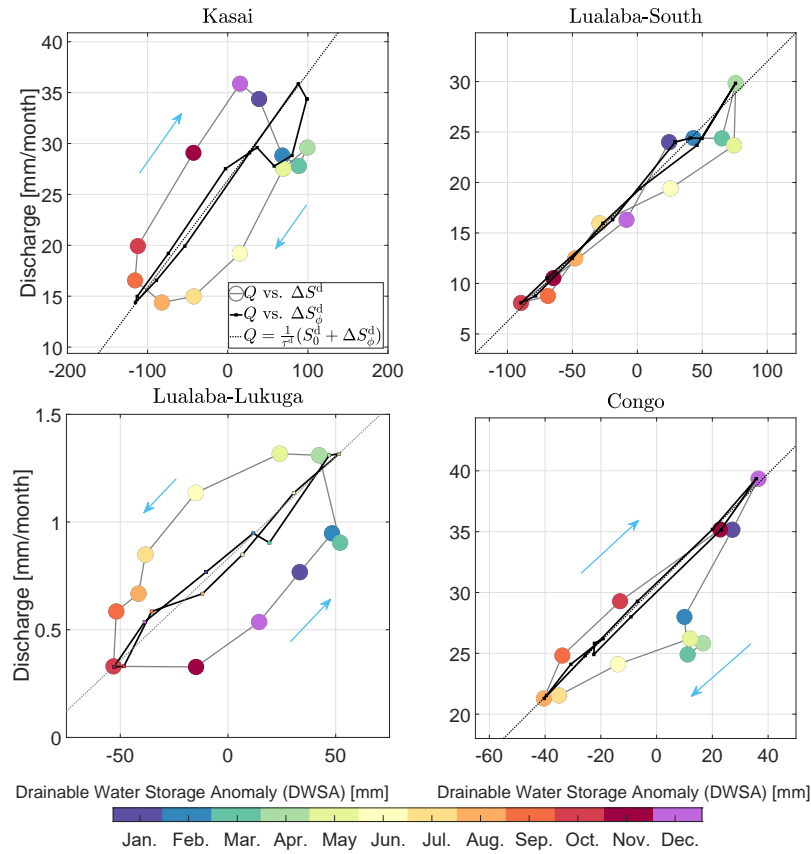

Figure S6: Mean monthly river discharge  $Q$  against mean monthly Drainable Water Storage Anomaly (TWSA – LWSA)  $\Delta S^d$  and time-shifted drainable water storage anomaly  $\Delta S_\phi^d$

## Supplementary Notes 6, Precipitation pattern over the Congo River Basin

Precipitation data are obtained from the Global Precipitation Climatology Centre (GPCC) [3]. Figure S7 shows the distribution of monthly mean precipitation (climatology) over the Congo River Basin and its subbasins.

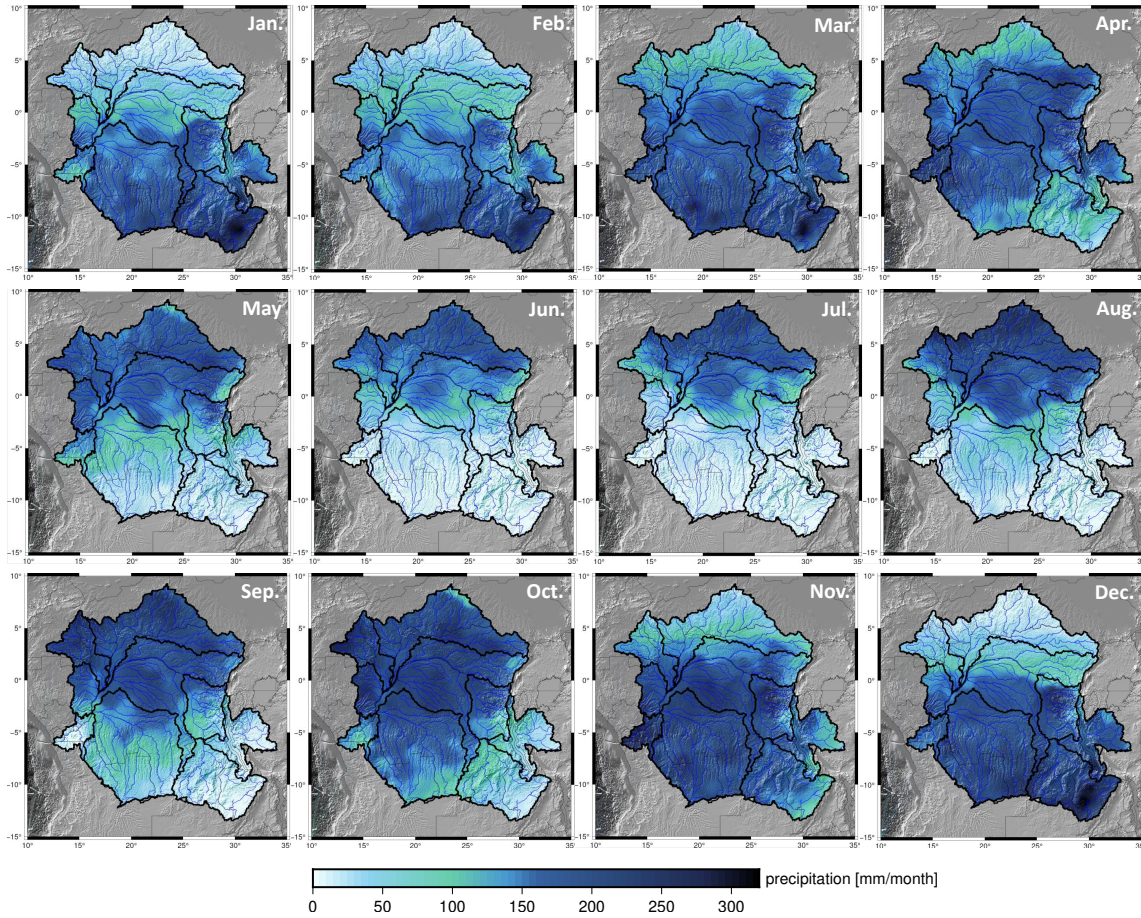

Figure S7: Mean monthly precipitation pattern over Congo and its sub-basins from GPCC dataset averaged over 1990–2019

## Supplementary References

- [1] J-F Crétaux, W. Jelinski, Stéphane Calmant, A. Kouraev, V. Vuglinski, M. Bergé-Nguyen, M.-C. Gennero, F. Nino, R. Abarca Del Rio, A. Cazenave, and P. Maisongrande. Sols: A lake database to monitor in the near real time water level and storage variations from remote sensing data. *Advances in Space Research*, 47(9):1497–1507, 2011.
- [2] M. J. Tourian, N. Sneeuw, and A. Bárdossy. A quantile function approach to discharge estimation from satellite altimetry (ENVISAT). *Water Resources Research*, 49:1–13, 2013.
- [3] U Schneider, A Becker, P Finger, A Meyer-Christoffer, B Rudolf, and M Ziese. GPCC full data reanalysis, version 7.0: Monthly land-surface precipitation from rain gauges built on gts based and historic data. research data archive at the national center for atmospheric research, computational and information systems laboratory, 2016.
